# Supplementary material for: Metallocyclic Ni4Ln2M2 single-molecule magnets
Source: Royal Society of Chemistry journal article supplement (doi:10.1039/c7dt00948h), 2017-01-01
Supplement: c7dt00948h1.pdf [file c7dt00948h1.pdf]

**Electronic Supplementary Information**

**Metallocyclic Ni<sub>4</sub>Ln<sub>2</sub>M<sub>2</sub> single-molecule magnets**

Mei-Jiao Liu,<sup>a</sup> Kong-Qiu Hu,<sup>a</sup> Cai-Ming Liu,<sup>b</sup> Ai-Li Cui<sup>a</sup> and Hui-Zhong Kou<sup>a,\*</sup>

<sup>a</sup> Department of Chemistry, Tsinghua University, Beijing 100084, P. R. China.

Email: kouhz@mail.tsinghua.edu.cn

<sup>b</sup> Beijing National Laboratory for Molecular Sciences, Center for Molecular Science,  
Institute of Chemistry, Chinese Academy of Sciences, Beijing 100190, P. R. China

**Table S1.** Selected bond distances (Å) and bond angles (°) for complexes **1** and **3-9**.

| Complex                | <b>1</b><br>(Ln = Dy, M<br>= Cr) | <b>3</b><br>(Ln = Dy, M<br>= Co) | <b>4</b><br>(Ln = Tb, M<br>= Cr) | <b>5</b><br>(Ln = Tb, M<br>= Fe) | <b>6</b><br>(Ln = Gd, M<br>= Cr) | <b>7</b><br>(Ln = Gd,<br>M = Fe) |
|------------------------|----------------------------------|----------------------------------|----------------------------------|----------------------------------|----------------------------------|----------------------------------|
| Ln1-O1                 | 2.329(5)                         | 2.330(3)                         | 2.337(4)                         | 2.338(5)                         | 2.349(6)                         | 2.362(7)                         |
| Ln1-O2                 | 2.379(5)                         | 2.388(3)                         | 2.391(4)                         | 2.409(5)                         | 2.400(6)                         | 2.415(4)                         |
| Ln1-O3                 | 2.516(4)                         | 2.521(3)                         | 2.525(4)                         | 2.531(5)                         | 2.532(5)                         | 2.527(6)                         |
| Ln1-O4                 | 2.498(5)                         | 2.500(3)                         | 2.511 (5)                        | 2.509(5)                         | 2.520(5)                         | 2.509(6)                         |
| Ln1-O5                 | 2.316(3)                         | 2.341(3)                         | 2.343(4)                         | 2.356(5)                         | 2.349(5)                         | 2.357(4)                         |
| Ln1-O6                 | 2.384(5)                         | 2.401(3)                         | 2.399(4)                         | 2.421(5)                         | 2.388(5)                         | 2.398(5)                         |
| Ln1-O7                 | 2.525(4)                         | 2.534(3)                         | 2.538(4)                         | 2.542(5)                         | 2.532(5)                         | 2.556(5)                         |
| Ln1-O8                 | 2.495(5)                         | 2.504(4)                         | 2.508(4)                         | 2.515(5)                         | 2.515(6)                         | 2.505(5)                         |
| Ln1-O1W                | 2.309(6)                         | 2.311(4)                         | 2.327(5)                         | 2.336(6)                         | 2.359(6)                         | 2.323(6)                         |
| Ni1-N9                 | 2.028(7)                         | 2.024(5)                         | 1.992(6)                         | 2.001(7)                         | 2.014(8)                         | 2.021(6)                         |
| Ni1-N10                | 2.027(6)                         | 2.026(4)                         | 2.026(6)                         | 2.030(8)                         | 2.031(7)                         | 2.018(6)                         |
| Ni1-O5                 | 2.038(4)                         | 2.017(4)                         | 2.032(6)                         | 2.024(7)                         | 2.030(7)                         | 2.018(5)                         |
| Ni1-O6                 | 2.012(4)                         | 2.020(3)                         | 2.029(4)                         | 2.031(5)                         | 2.018(5)                         | 2.012(5)                         |
| Ni2-N7                 | 2.068(7)                         | 2.031(4)                         | 2.011(7)                         | 2.012(7)                         | 2.022(8)                         | 2.012(5)                         |
| Ni2-N8                 | 2.007(7)                         | 2.006(5)                         | 2.020(5)                         | 2.043(6)                         | 2.008(8)                         | 2.015(7)                         |
| Ni2-O1                 | 2.022(5)                         | 2.031(3)                         | 2.014(4)                         | 2.018(5)                         | 2.042(6)                         | 2.018(4)                         |
| Ni2-O2                 | 2.012(5)                         | 2.011(3)                         | 1.977(6)                         | 2.024(7)                         | 2.015(6)                         | 2.005(7)                         |
| Ni1-N <sub>cyano</sub> | 1.993(7)                         | 1.996(4)                         | 2.008(4)                         | 2.014(5)                         | 1.992(8)                         | 1.99(1)                          |
| Ni2-N <sub>cyano</sub> | 2.003(8)                         | 2.002(4)                         | 2.054(7)                         | 2.051(7)                         | 2.001(8)                         | 1.985(6)                         |
| M-C <sub>cyano</sub>   | 2.047(7)-<br>2.077(8)            | 1.888(5)-<br>1.909(6)            | 2.047(6)-<br>2.072(7)            | 1.937(8)-<br>1.967(9)            | 2.036(8)-<br>2.08(1)             | 1.923(5)-<br>1.97(1)             |
| C≡N-Ni                 | 164.6(8)-<br>163.9(7)            | 162.7(4)-<br>163.1(4)            | 165.2(6)-<br>166.8(5)            | 162.4(6)-<br>164.1(6)            | 166.4(7)-<br>166.8(7)            | 159.8(7)-<br>164.3(7)            |
| M-C≡N                  | 172.5(8)-<br>177.6(9)            | 175.5(4)-<br>179.5(5)            | 174.0(6)-<br>178.2(8)            | 175.0(7)-<br>179.6(8)            | 169.7(7)-<br>177.7(9)            | 175.5(7)-<br>179.3(8)            |

## Continuing

| Complex                | <b>8</b><br><b>(Ln = Y, M = Cr)</b> | <b>9</b><br><b>(Ln = Y, M = Fe)</b> |
|------------------------|-------------------------------------|-------------------------------------|
| Ln1-O1                 | 2.308(3)                            | 2.321(3)                            |
| Ln1-O2                 | 2.372(3)                            | 2.382(3)                            |
| Ln1-O3                 | 2.484(3)                            | 2.515(3)                            |
| Ln1-O4                 | 2.509(3)                            | 2.485(3)                            |
| Ln1-O5                 | 2.366(3)                            | 2.367(3)                            |
| Ln1-O6                 | 2.310(3)                            | 2.315(4)                            |
| Ln1-O7                 | 2.516(3)                            | 2.538(3)                            |
| Ln1-O8                 | 2.480(3)                            | 2.471(3)                            |
| Ln1-O1W                | 2.304(4)                            | 2.292(3)                            |
| Ni1-N7                 | 2.005(4)                            | 2.006(4)                            |
| Ni1-N8                 | 2.031(4)                            | 2.017(4)                            |
| Ni1-O1                 | 2.034(3)                            | 2.024(3)                            |
| Ni1-O2                 | 2.009(3)                            | 2.002(4)                            |
| Ni2-N9                 | 2.019(4)                            | 2.022(5)                            |
| Ni2-N10                | 2.012(4)                            | 2.016(4)                            |
| Ni2-O5                 | 2.014(3)                            | 2.012(4)                            |
| Ni2-O6                 | 2.021(3)                            | 2.010(3)                            |
| Ni1-N <sub>cyano</sub> | 1.993(5)                            | 1.995(5)                            |
| Ni2-N <sub>cyano</sub> | 1.985(5)                            | 1.976(5)                            |
| M-C <sub>cyano</sub>   | 2.031(5)-2.070(6)                   | 1.920(6)-1.959(7)                   |
| C≡N-Ni                 | 165.8(4)-165.8(4)                   | 159.7(5)-163.4(5)                   |
| M-C≡N                  | 172.1(4)-178.0(5)                   | 176.1(5)-179.2(5)                   |

**Table S2.** Selected bond distances (Å) and bond angles (°) for complex **2**.

|         |                   |         |                   |
|---------|-------------------|---------|-------------------|
| Dy1-O9  | 2.330(5)          | Dy2-O1  | 2.346(6)          |
| Dy1-O10 | 2.525(5)          | Dy2-O2  | 2.379(6)          |
| Dy1-O11 | 2.362(6)          | Dy2-O3  | 2.506(5)          |
| Dy1-O12 | 2.392(6)          | Dy2-O4  | 2.539(6)          |
| Dy1-O13 | 2.347(6)          | Dy2-O5  | 2.338(5)          |
| Dy1-O14 | 2.553(6)          | Dy2-O6  | 2.357(6)          |
| Dy1-O15 | 2.545(5)          | Dy2-O7  | 2.523(5)          |
| Dy1-O16 | 2.525(6)          | Dy2-O8  | 2.500(5)          |
| Dy1-O1W | 2.295(5)          | Dy2-O2W | 2.296(5)          |
| Ni1-O9  | 2.015(6)          | Ni3-O5  | 2.013(6)          |
| Ni1-O11 | 2.000(5)          | Ni3-O6  | 2.013(5)          |
| Ni1-N19 | 2.012(7)          | Ni3-N10 | 1.995(7)          |
| Ni1-N20 | 1.989(6)          | Ni3-N15 | 2.033(7)          |
| Ni1-N19 | 1.987(9)          | Ni3-N16 | 1.989(8)          |
| Ni2-O12 | 2.004(6)          | Ni4-O1  | 2.006(6)          |
| Ni2-O13 | 2.032(5)          | Ni4-O2  | 2.009(6)          |
| Ni2-N6  | 1.982(8)          | Ni4-N13 | 2.023(8)          |
| Ni2-N17 | 2.029(9)          | Ni4-N14 | 2.034(8)          |
| Ni2-N18 | 2.006(8)          | Ni4-N12 | 2.002(8)          |
| Cr1-C   | 2.020(8)-2.084(9) | Cr2-C   | 2.015(8)-2.07(1)  |
| C≡N-Ni1 | 163.9(7)          | C≡N-Ni3 | 161.4(7)          |
| C≡N-Ni2 | 164.6(8)          | C≡N-Ni4 | 162.9(8)          |
| C≡N-Cr1 | 172.5(8)-177.6(9) | C≡N-Cr2 | 173.0(8)-178.1(9) |

**Table S3.** Magnetic data for complexes **1-9**.

|                                                              | $^{2S+1}L_J$<br>(Ln <sup>III</sup> ) | Theoretical $\chi_m T$<br>/cm <sup>3</sup> K mol <sup>-1</sup> | Experimental $\chi_m T$<br>/cm <sup>3</sup> K mol <sup>-1</sup> | Weiss<br>constant/K | Magnetization<br>(theoretical)/ $N\beta$ |
|--------------------------------------------------------------|--------------------------------------|----------------------------------------------------------------|-----------------------------------------------------------------|---------------------|------------------------------------------|
| Ni <sub>4</sub> Cr <sub>2</sub> Dy <sub>2</sub> ( <b>1</b> ) | <sup>6</sup> H <sub>15/2</sub>       | 36.09                                                          | 38.50                                                           | 12.3                | 30.3 (34)                                |
| Ni <sub>4</sub> Cr <sub>2</sub> Dy <sub>2</sub> ( <b>2</b> ) | <sup>6</sup> H <sub>15/2</sub>       | 36.09                                                          | 41.75                                                           | 40.5                | 30.7 (34)                                |
| Ni <sub>4</sub> Co <sub>2</sub> Dy <sub>2</sub> ( <b>3</b> ) | <sup>6</sup> H <sub>15/2</sub>       | 32.34                                                          | 37.6                                                            | 40.8                | 25.0 (28)                                |
| Ni <sub>4</sub> Cr <sub>2</sub> Tb <sub>2</sub> ( <b>4</b> ) | <sup>7</sup> F <sub>6</sub>          | 31.39                                                          | 30.58                                                           | 29.5                | 22.0 (32)                                |
| Ni <sub>4</sub> Fe <sub>2</sub> Tb <sub>2</sub> ( <b>5</b> ) | <sup>7</sup> F <sub>6</sub>          | 28.39                                                          | 28.47                                                           | 27.9                | 23.4 (28)                                |
| Ni <sub>4</sub> Cr <sub>2</sub> Gd <sub>2</sub> ( <b>6</b> ) | <sup>8</sup> S <sub>7/2</sub>        | 23.51                                                          | 25.93                                                           | 24.8                | 27.6 (28)                                |
| Ni <sub>4</sub> Fe <sub>2</sub> Gd <sub>2</sub> ( <b>7</b> ) | <sup>8</sup> S <sub>7/2</sub>        | 20.51                                                          | 21.84                                                           | 21.0                | 24.7 (24)                                |
| Ni <sub>4</sub> Cr <sub>2</sub> Y <sub>2</sub> ( <b>8</b> )  | /                                    | 7.75                                                           | 9.15                                                            | 8.6                 | 13.2 (14)                                |
| Ni <sub>4</sub> Fe <sub>2</sub> Y <sub>2</sub> ( <b>9</b> )  | /                                    | 4.75                                                           | 6.03                                                            | 6.0                 | 6.8 (10)                                 |

**Table S4.** Cole-Cole plots fitting parameters for complexes **1-5**.

| $T / K$  | $\alpha$   |                      | $\tau$   |                       | $\chi$                |          | $\beta$                |      |
|----------|------------|----------------------|----------|-----------------------|-----------------------|----------|------------------------|------|
|          | $\alpha_1$ | $\alpha_2$           | $\tau_1$ | $\tau_2$              | $\chi_T$              | $\chi_S$ | $\beta$                |      |
| <b>1</b> | 2          | $5.8 \times 10^{-2}$ | -        | 1.91                  | -                     | 13.0     | 0.47                   | -    |
|          | 3          | $5.7 \times 10^{-2}$ | 0.23     | $6.7 \times 10^{-3}$  | $9.3 \times 10^{-2}$  | 24.85    | 0.37                   | 0.85 |
|          | 3.5        | $4.4 \times 10^{-2}$ | 0.24     | $1.0 \times 10^{-3}$  | $2.4 \times 10^{-3}$  | 23.33    | $3.62 \times 10^{-14}$ | 0.74 |
| <b>2</b> | 2          | 0.18                 | -        | 2.42                  | -                     | 104.53   | 2.58                   | -    |
| <b>3</b> | 3          | $8.4 \times 10^{-2}$ | 0.24     | $2.2 \times 10^{-2}$  | $4.7 \times 10^{-3}$  | 22.5     | 0.70                   | 0.54 |
|          | 4          | $6.5 \times 10^{-2}$ | 0.12     | $4.3 \times 10^{-3}$  | $1.04 \times 10^{-3}$ | 17.7     | 1.50                   | 0.49 |
| <b>4</b> | 2          | 0.55                 | 0.34     | 0.11                  | $1.78 \times 10^{-2}$ | 32.41    | 6.99                   | 0.38 |
|          | 2.2        | 0.38                 | 1.39     | $9.16 \times 10^{-3}$ | 0.47                  | 25.70    | 12.24                  | 1.44 |
|          | 2.4        | 0.38                 | 1.35     | $2.93 \times 10^{-3}$ | 0.24                  | 23.83    | 12.34                  | 1.59 |
|          | 2.6        | 0.37                 | 0.62     | $1.77 \times 10^{-2}$ | $9.94 \times 10^{-3}$ | 28.05    | 4.42                   | 0.58 |
|          | 2.8        | 0.39                 | 0.42     | $8.99 \times 10^{-4}$ | $2.21 \times 10^{-2}$ | 25.96    | 4.63                   | 0.79 |
| <b>5</b> | 2          | 0.21                 | 0.25     | $3.82 \times 10^{-3}$ | $5.46 \times 10^{-2}$ | 46.09    | 5.95                   | 0.68 |
|          | 2.5        | 0.26                 | 0.18     | $3.40 \times 10^{-4}$ | $5.88 \times 10^{-3}$ | 42.27    | 0.11                   | 0.75 |

**Table S5.** Magnetic data for 3d-3d<sup>7</sup>-4f heterotrimetallic complexes with cyanide bridges.

| Complexes                                                                                                                                                                              | SMM/SCM<br>(Yes or<br>No) | U <sub>eff</sub><br>(K) | External<br>dc field<br>(kOe) | Ref       |
|----------------------------------------------------------------------------------------------------------------------------------------------------------------------------------------|---------------------------|-------------------------|-------------------------------|-----------|
| <b>NiDyM system (M = Fe, Cr)</b>                                                                                                                                                       |                           |                         |                               |           |
| [(CN) <sub>7</sub> W(CN)Ni(dmf)(valdmpn)Dy(dmf) <sub>4</sub> ]·H <sub>2</sub> O                                                                                                        | N                         | /                       |                               | 8b        |
| [{Ru(acac) <sub>2</sub> (μ-CN) <sub>2</sub> } {Ni(μ-L)Dy((CH <sub>3</sub> OH)(NO <sub>3</sub> ) <sub>2</sub> ) <sub>2</sub> } <sub>2</sub> ][Ru(acac) <sub>2</sub> (CN) <sub>2</sub> ] | N                         | /                       | 0                             | 4d        |
| {[Ni(valpn)Dy(ONO <sub>2</sub> ) <sub>2</sub> (H <sub>2</sub> O)(μ-NC) <sub>3</sub> Fe(bipy)(CN)]·2H <sub>2</sub> O·2CH <sub>3</sub> CN} <sub>n</sub>                                  | N                         | /                       | /                             | 11        |
| [{LMe <sub>2</sub> Ni(H <sub>2</sub> O)Dy(H <sub>2</sub> O) <sub>4.5</sub> } <sub>2</sub> {W(CN) <sub>8</sub> } <sub>2</sub> ]·15H <sub>2</sub> O                                      | SMM                       | /                       | 0                             | 21a       |
| [Ni <sub>4</sub> Dy <sub>2</sub> Cr <sub>2</sub> ]-1                                                                                                                                   | SMM                       | 38.9                    | 0                             | This work |
| [Ni <sub>4</sub> Dy <sub>2</sub> Cr <sub>2</sub> ]-2                                                                                                                                   | SMM                       | 37.2                    | 0                             | This work |
| [Ni <sub>4</sub> Dy <sub>2</sub> Co <sub>2</sub> ]-3                                                                                                                                   | SMM                       | 24.4                    | 0                             | This work |
| {[Ni(Me <sub>2</sub> valpn)] <sub>2</sub> Dy(H <sub>2</sub> O)Fe(CN) <sub>6</sub> } <sub>2</sub> ·14H <sub>2</sub> O·4DMF                                                              | SMM                       | 25.0                    | 0                             | 10        |
| [{L <sup>Me2</sup> NiDy(H <sub>2</sub> O)NiL <sup>Me2</sup> }W(CN) <sub>8</sub> ] <sub>2</sub> ·10MeCN·H <sub>2</sub> O                                                                | SMM                       | 26.4                    | 0                             | 12        |
| [Ni(valpn)(H <sub>2</sub> O)Dy(H <sub>2</sub> O) <sub>3</sub> Fe(CN) <sub>6</sub> ] <sub>2</sub> ·8H <sub>2</sub> O                                                                    | SMM                       | 17.9                    | 2                             | 10        |
| {[Cu(Me <sub>2</sub> valpn)] <sub>2</sub> Dy(H <sub>2</sub> O)Fe(CN) <sub>6</sub> ·5.5H <sub>2</sub> O·6.5CH <sub>3</sub> CN} <sub>n</sub>                                             | SMM                       | 12.3                    | 2                             | 13        |
| [{(CuL) <sub>2</sub> Dy} {Mo(CN) <sub>8</sub> }·CH <sub>3</sub> CN·H <sub>2</sub> O                                                                                                    | SMM                       | 19.1                    | 0                             | 7a        |
| {[Zn(Me <sub>2</sub> valpn)] <sub>2</sub> Dy(H <sub>2</sub> O)Co(CN) <sub>6</sub> } <sub>2</sub> ·15H <sub>2</sub> O·2DMF·5CH <sub>3</sub> CN                                          | SIM                       | 85.9                    | 0                             | 4c        |
| {[Zn(Me <sub>2</sub> valpn)] <sub>2</sub> Dy(H <sub>2</sub> O)Cr(CN) <sub>6</sub> } <sub>2</sub> ·7H <sub>2</sub> O·4DMF                                                               | SIM                       | 100.9                   | 0                             | 4c        |
| {[Ni(valpn)Dy(NO <sub>3</sub> )(H <sub>2</sub> O)(μ-NC) <sub>4</sub> W(bipy)(CN) <sub>2</sub> ]·3.9H <sub>2</sub> O·2CH <sub>3</sub> CN} <sub>n</sub>                                  | SCM                       | 22.8                    | 2.5                           | 4e        |
| {[Ni(L)Dy(NO <sub>3</sub> ) <sub>2</sub> (H <sub>2</sub> O)Fe(Tp*)(CN) <sub>3</sub> ]·2CH <sub>3</sub> CN·CH <sub>3</sub> OH} <sub>n</sub>                                             | SCM                       | 58.2                    | 0                             | 7c        |
| <b>NiTbM system</b>                                                                                                                                                                    |                           |                         |                               |           |
| [{L <sup>Me2</sup> NiTb(H <sub>2</sub> O)NiL <sup>Me2</sup> }Co(CN) <sub>6</sub> ] <sub>2</sub> ·2Me <sub>2</sub> CO <sub>2</sub> ·H <sub>2</sub> O                                    | N                         | /                       | /                             | 12        |
| [(CN) <sub>7</sub> W(CN)Ni(dmf)(valdmpn)Tb(dmf) <sub>4</sub> ]·H <sub>2</sub> O                                                                                                        | N                         | /                       |                               | 8b        |
| [{LMe <sub>2</sub> Ni(H <sub>2</sub> O)Tb(H <sub>2</sub> O) <sub>4.5</sub> } <sub>2</sub> {W(CN) <sub>8</sub> } <sub>2</sub> ]·15H <sub>2</sub> O                                      | SMM                       | /                       | 3                             | 21a       |
| [{L <sup>Me2</sup> Ni(DMF)Tb(DMF) <sub>4</sub> } {W(CN) <sub>8</sub> }] <sub>2</sub> ·3H <sub>2</sub> O                                                                                | SMM                       | /                       | 0                             | 21b       |
| [{L <sup>Me2</sup> Ni(H <sub>2</sub> O)Tb(DMF) <sub>2.5</sub> (H <sub>2</sub> O) <sub>1.5</sub> } {W(CN) <sub>8</sub> }] <sub>2</sub> ·H <sub>2</sub> O·0.5DMF                         | SMM                       | 15.3                    | 0                             | 21b       |
| [Ni <sub>4</sub> Tb <sub>2</sub> Cr <sub>2</sub> ]-4                                                                                                                                   | SMM                       | 21.9                    | 0                             | This work |
| [{L <sup>Me2</sup> NiTb(H <sub>2</sub> O)NiL <sup>Me2</sup> }W(CN) <sub>8</sub> ] <sub>2</sub> ·10MeCN·2H <sub>2</sub> O                                                               | SMM                       | 23.0                    | 0                             | 12        |
| [Ni <sub>4</sub> Tb <sub>2</sub> Fe <sub>2</sub> ]-5                                                                                                                                   | SMM                       | 29.6                    | 0                             | This work |
| {[Ni(valpn)Tb(ONO <sub>2</sub> ) <sub>2</sub> (H <sub>2</sub> O)(μ-NC) <sub>3</sub> Fe(bipy)(CN)]·2H <sub>2</sub> O·2CH <sub>3</sub> CN} <sub>n</sub>                                  | SCM                       | 29.1                    | 0                             | 11        |
| {[Ni(L)Tb(NO <sub>3</sub> ) <sub>2</sub> (H <sub>2</sub> O)Fe(Tp*)(CN) <sub>3</sub> ]·2CH <sub>3</sub> CN·CH <sub>3</sub> OH} <sub>n</sub>                                             | SCM                       | 55.6                    | 0                             | 7c        |

---

**Cu(II)Tb(III)M(III/V) system**

|                                                                                                                                                                         |     |       |     |     |
|-------------------------------------------------------------------------------------------------------------------------------------------------------------------------|-----|-------|-----|-----|
| $[(\text{CN})_5(\text{bipy})\text{W}(\text{CN})\text{Cu}(3\text{-MeOsapn})\text{Tb}(\text{O}_2\text{NO})_2(\text{H}_2\text{O})] \cdot 3\text{MeCN}$                     | N   | /     | /   | 21c |
| $[\text{Cu}(\text{valpn})(\text{H}_2\text{O})\text{Tb}(\text{H}_2\text{O})_3\text{Fe}(\text{CN})_6] \cdot 2\text{H}_2\text{O}$                                          | N   | /     | 0/2 | 13  |
| $\{[\text{Cu}(\text{Me}_2\text{valpn})]_2\text{Tb}(\text{H}_2\text{O})\text{Fe}(\text{CN})_6 \cdot 4.5\text{H}_2\text{O} \cdot 1.5\text{CH}_3\text{CN}\}_n$             | N   | /     | 0/2 | 13  |
| $[\text{Cu}(\text{valpn})(\text{H}_2\text{O})\text{Tb}(\text{H}_2\text{O})_3\text{Fe}(\text{CN})_6] \cdot 1.75\text{H}_2\text{O}$                                       | SMM | /     | 0/2 | 13  |
| $[\{\text{LCuTb}(\text{H}_2\text{O})_3\} \{\text{Fe}(\text{CN})_6\}] \cdot 4\text{H}_2\text{O}$                                                                         | SMM | /     | 3   | 7b  |
| $[\text{L}_2\text{CuTb}(\text{H}_2\text{O})_5(\mu\text{-NC})\text{Mo}(\text{CN})_7]$                                                                                    | SMM | /     | 0   | 8a  |
| $[\text{Cu}(\text{H}_2\text{L})(\text{CH}_3\text{OH})]_2\text{Tb}(\text{H}_2\text{O})_{0.57}(\text{DMF})_{0.43}\text{Fe}(\text{CN}) \cdot 65.5\text{H}_2\text{O}$       | SMM | 13    | 2   | 4a  |
| $[(\text{Mo}(\text{CN})_8)_2(\text{CuLTb})_4](\text{Mo}(\text{CN})_8)$                                                                                                  | SMM | 19.25 | 0   | 9   |
| $[\{\text{W}(\text{CN})_8\}\text{Cu}(\text{valen})\text{Tb}(\text{H}_2\text{O})_4]_n \cdot n\text{CH}_3\text{CN} \cdot n\text{H}_2\text{O}$                             | SCM | 53.9  | 0   | 7d  |
| $\{[\text{Cu}_3\text{Tb}(\text{L}^{\text{Pr}})\text{W}(\text{CN})_8(\text{DMF})_3(\text{H}_2\text{O})_3] \cdot (\text{DMF})_{1.5} \cdot (\text{H}_2\text{O})_{0.5}\}_n$ | SCM | 20    | 0.8 | 21d |

---

(a)

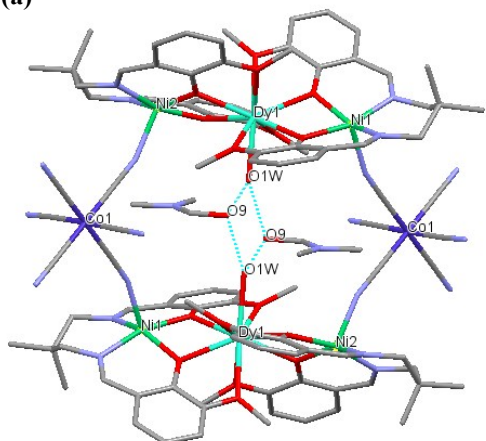

(b)

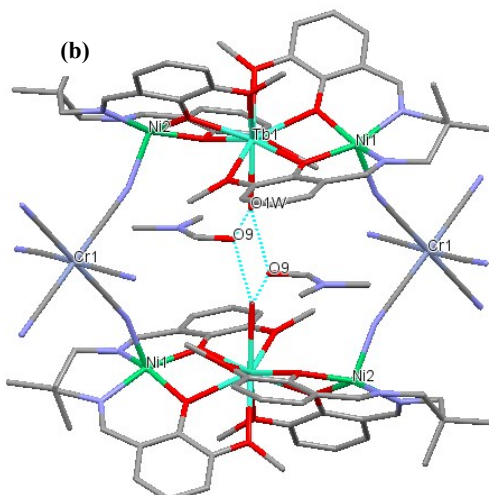

(c)

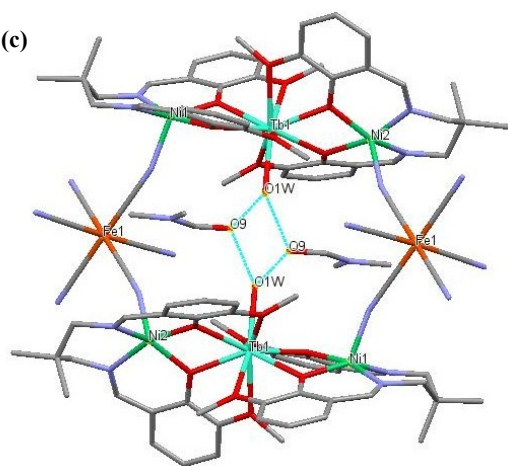

(d)

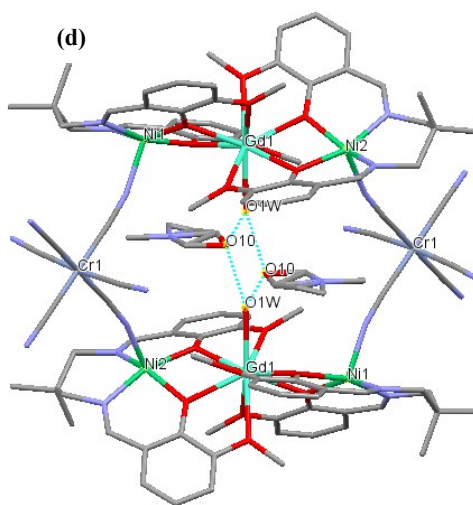

(e)

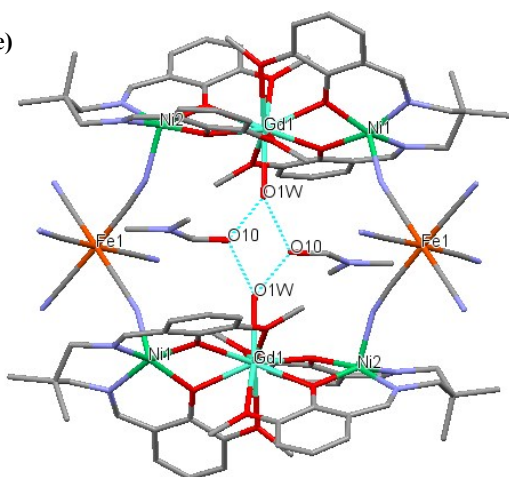

(f)

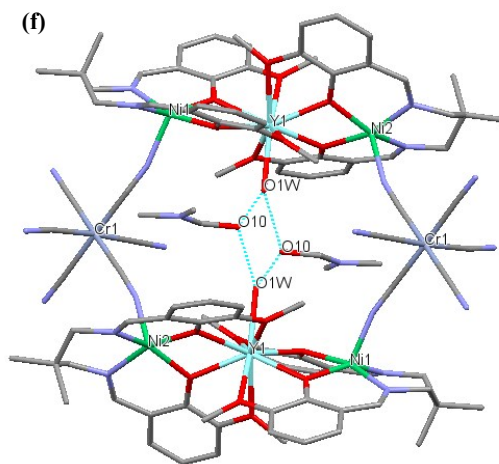



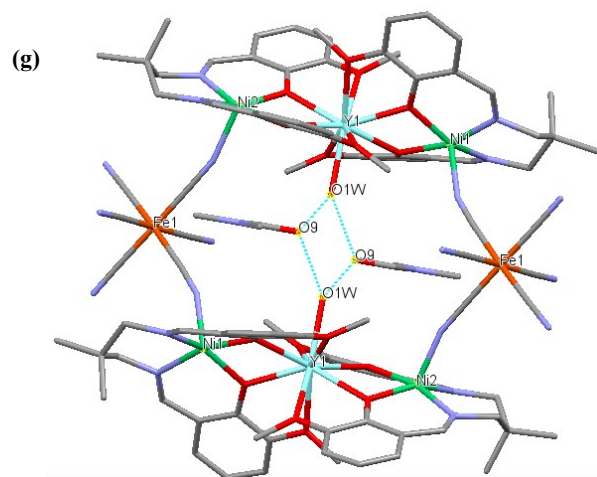

**Fig. S1.** Main molecular structure of complexes **3** (a), **4** (b), **5** (c), **6** (d), **7** (e), **8** (f) and **9** (g). Hydrogen and most solvents have been omitted for clarity.

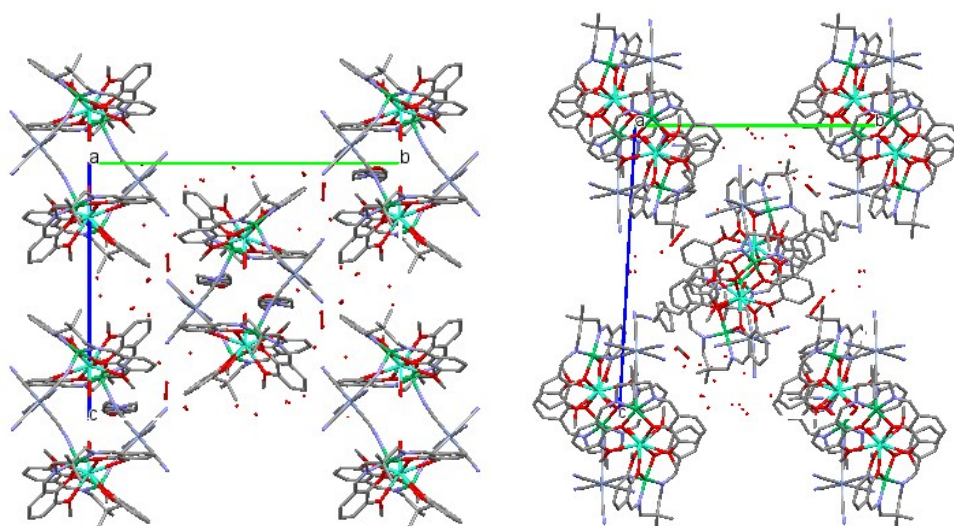

**Fig. S2.** Cell packing diagram for complexes **1** (left) and **2** (right).

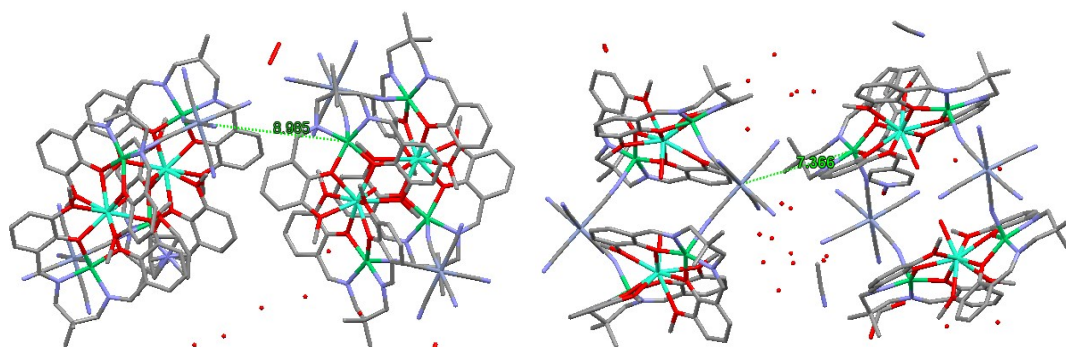

**Fig. S3.** The nearest intermolecular distance of sketches for complexes **1** (left) and **2** (right).

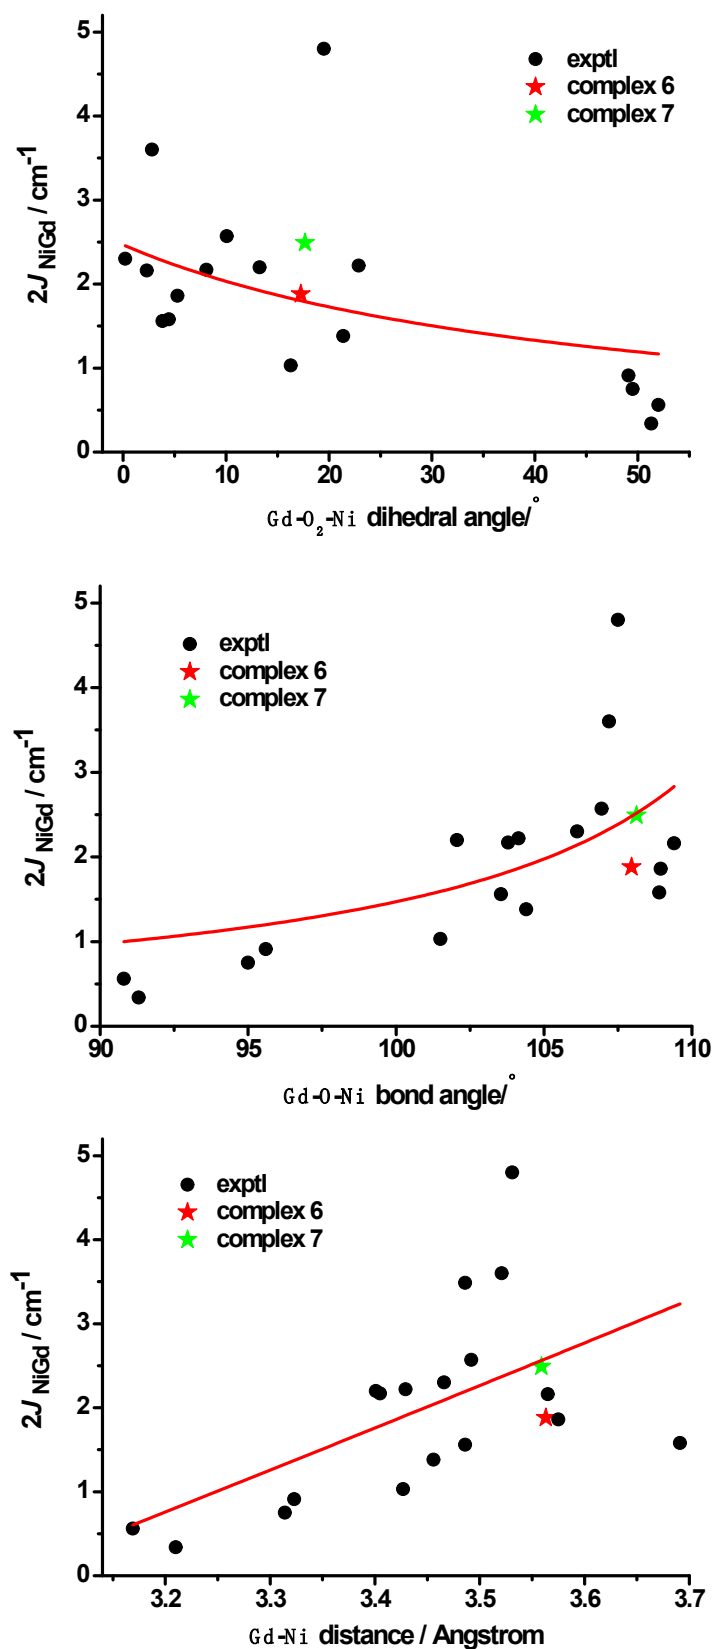

**Fig. S4.** Magneto-structural correlation for bis-phenoxo-bridged Ni(II)-Gd(III) complexes. The pentagrams correspond to complexes 6 and 7. The lines are guides for eyes.

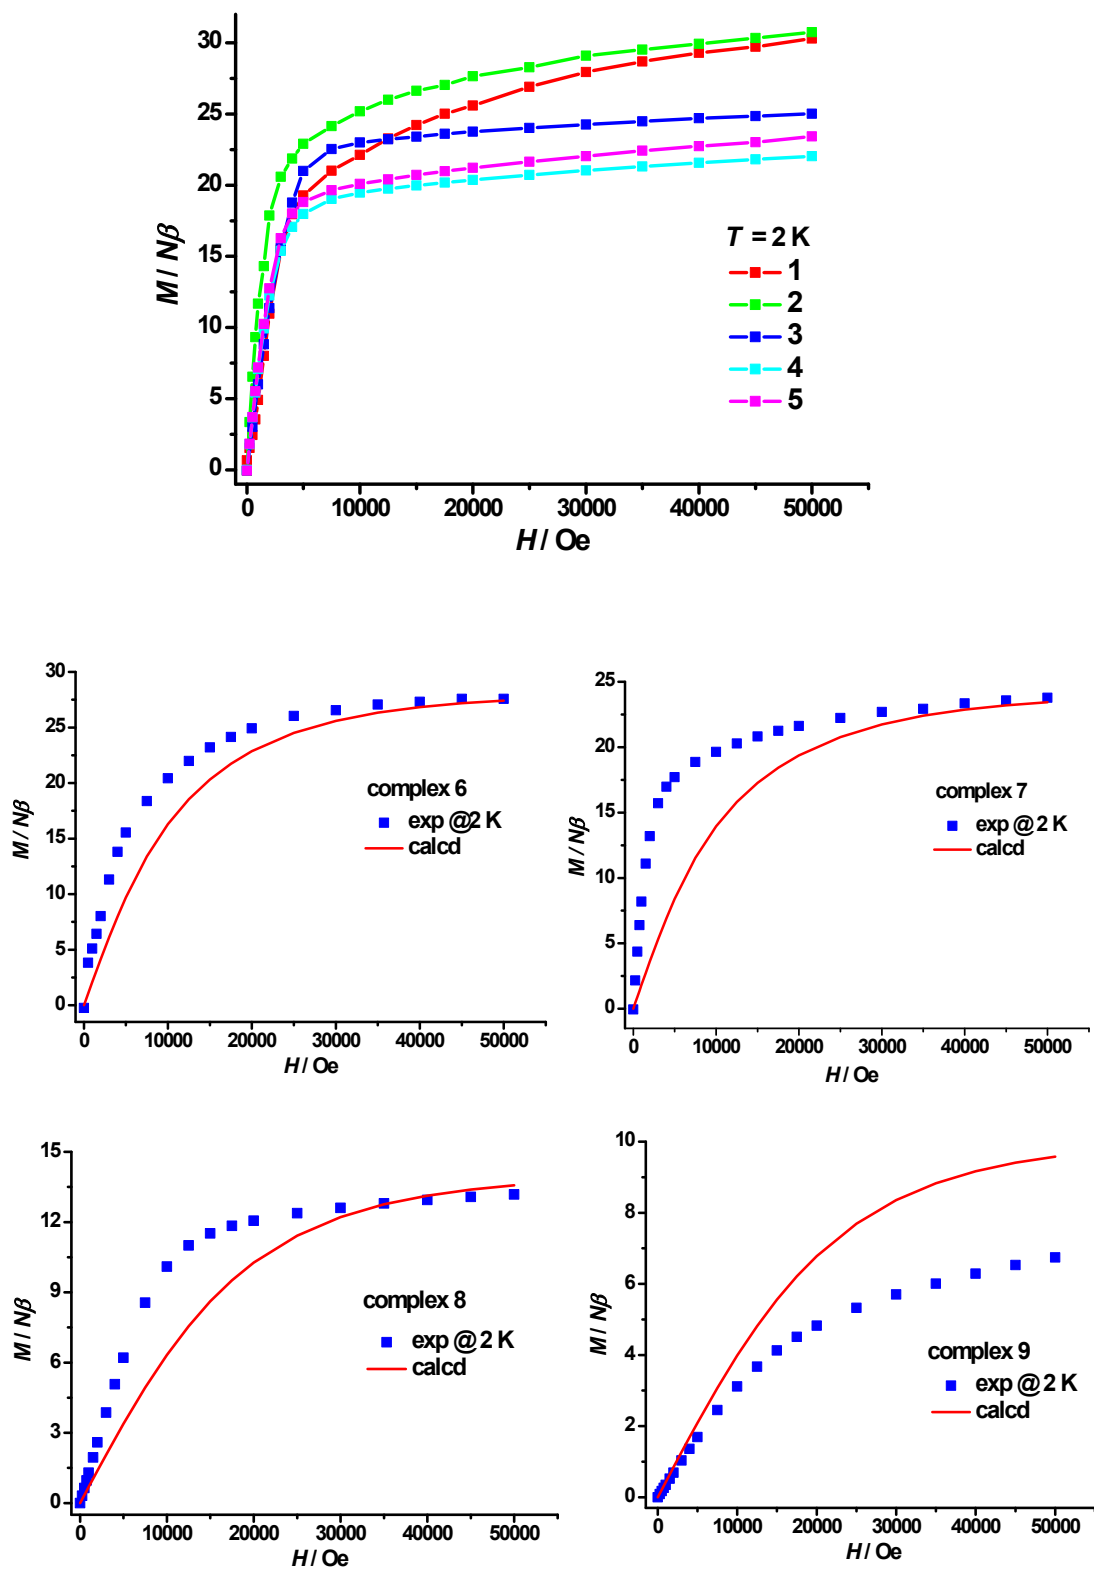

Fig. S5. Magnetization curve for complexes 1-9 at 2 K. The solid lines for complexes 6-9 represent the calculated data based on the Brillouin function for non-coupling spins with  $g = 2.0$ .

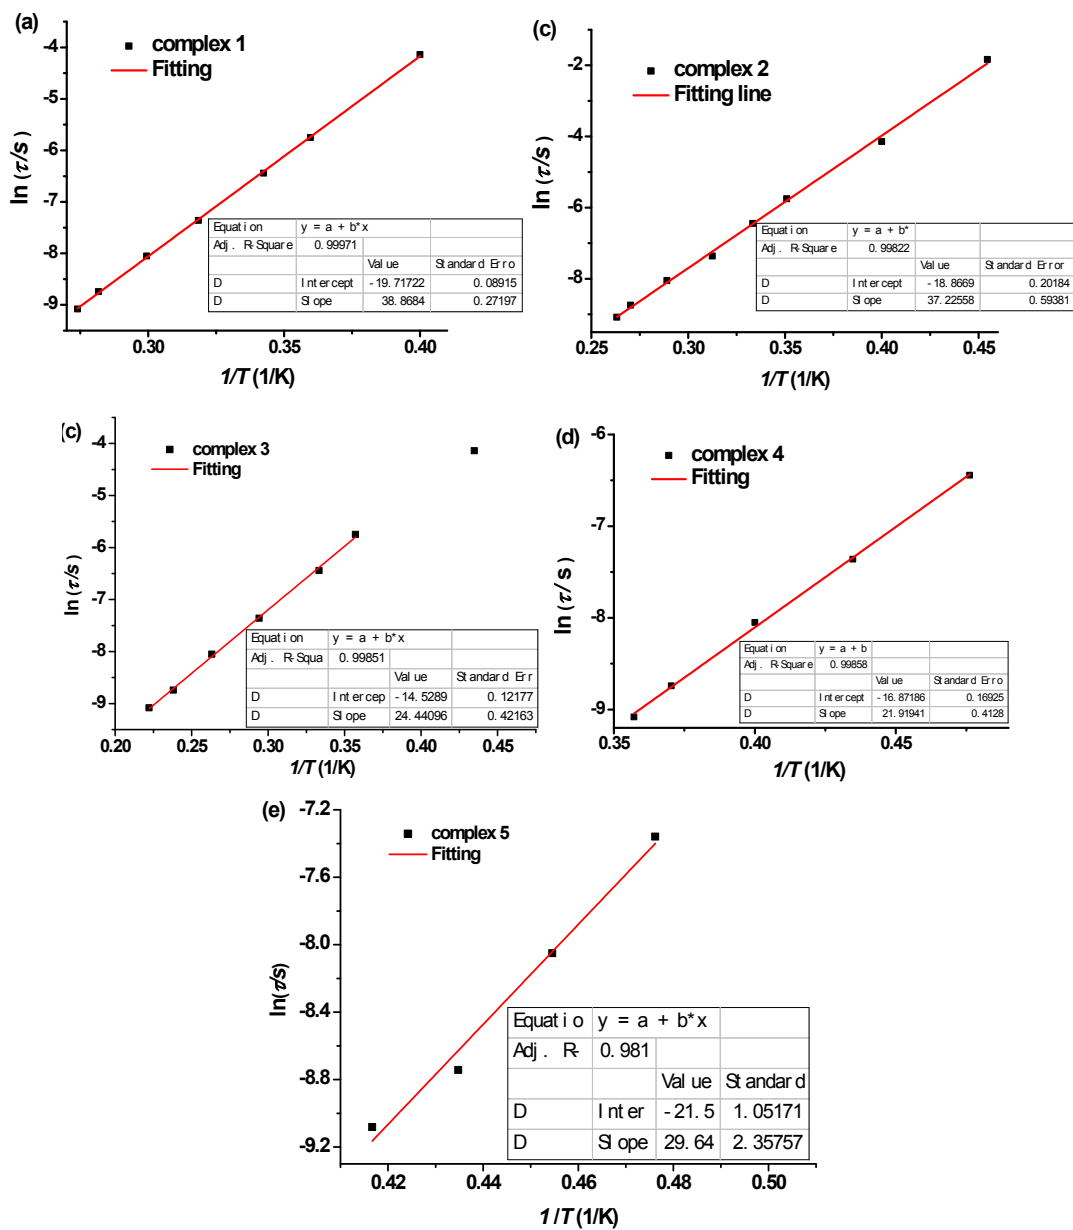

Fig. S6. The  $\ln(\tau)$  vs.  $T^{-1}$  plots based on the Arrhenius relationship for complexes 1-5.

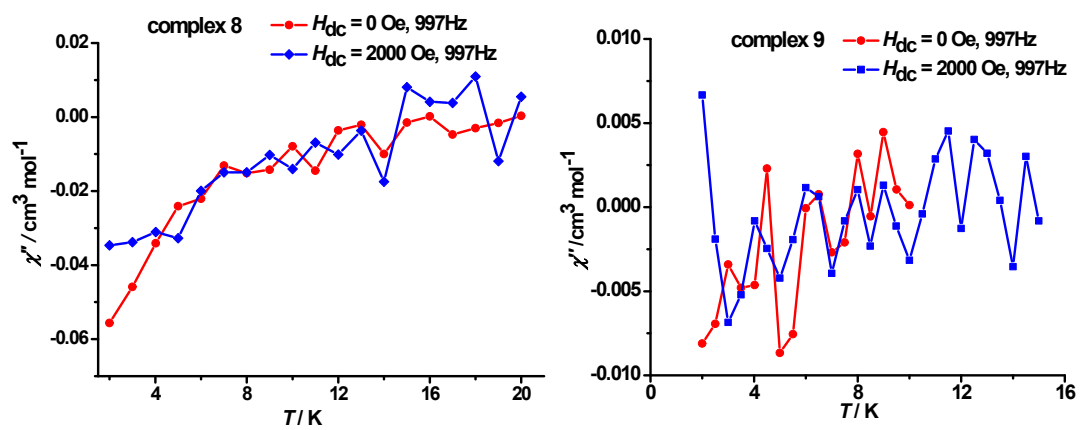

**Fig. S7.** Temperature dependence of the out-of-phase ( $\chi''$ ) components of the ac magnetic susceptibility for **8** (left) and **9** (right) with an oscillation field of 2.5 Oe.

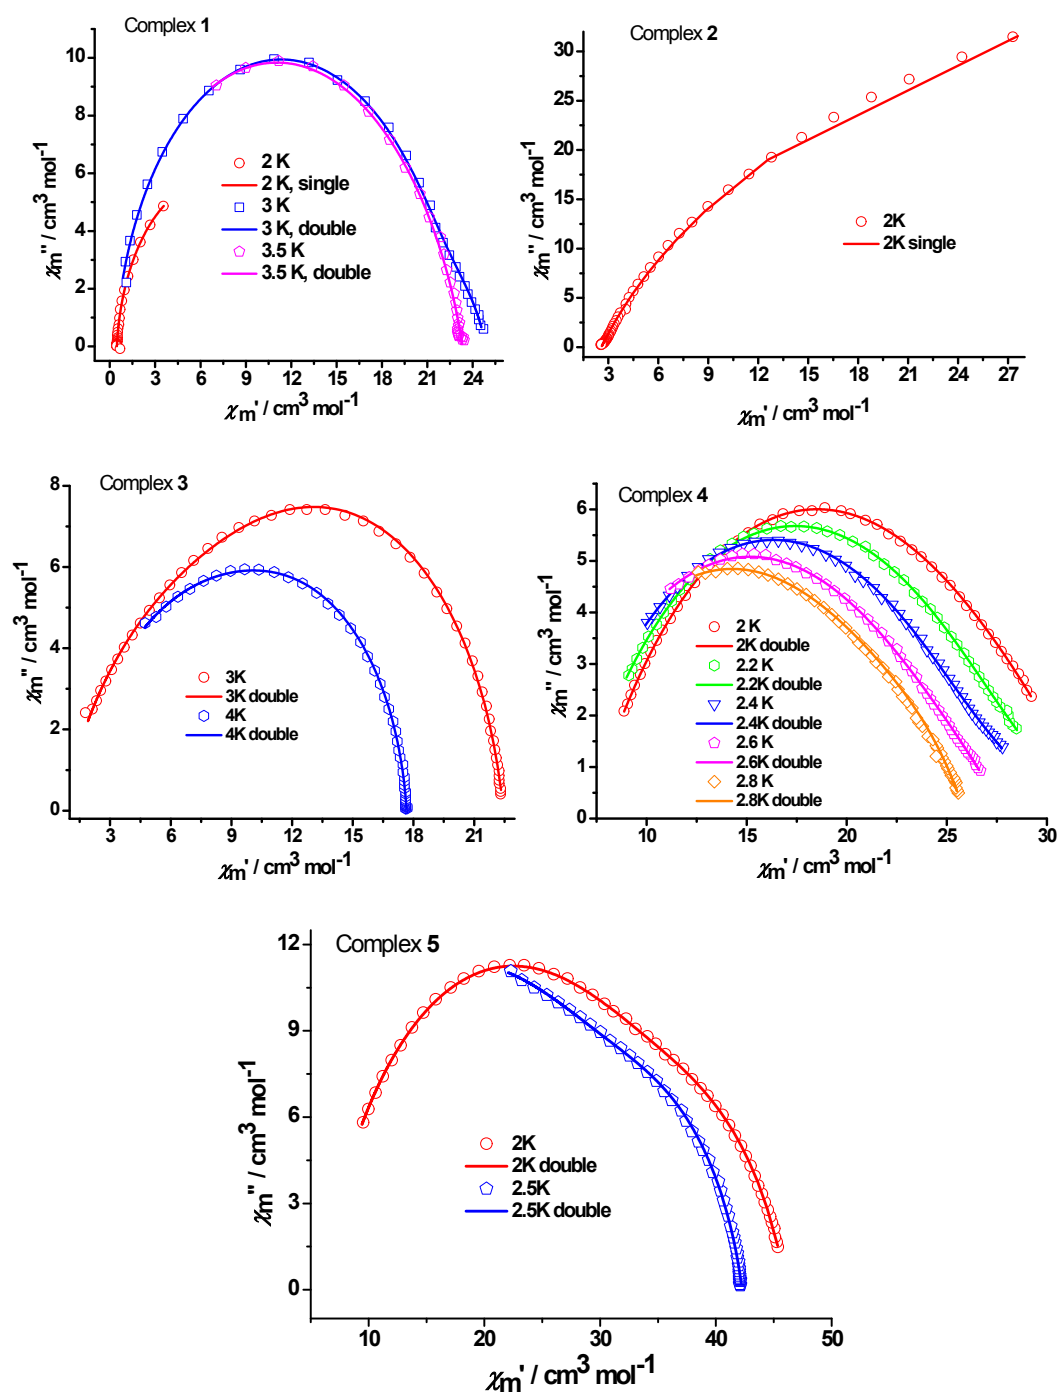

**Fig. S8.** Cole-Cole plots of complexes 1-5. The solid lines represent the fitting results using the parameters listed in Table S4.
